# Supplementary material for: 北果南销的晋商骄子——记广州·运城果品市场董事长兼总经理吕留运
Source: MDPI journal article supplement (doi:10.3390/mi13101769), 2005-01-01
Supplement: s1 [file s1]

# Supporting information

## Metasurfaces as energy valves for sustainable energy management

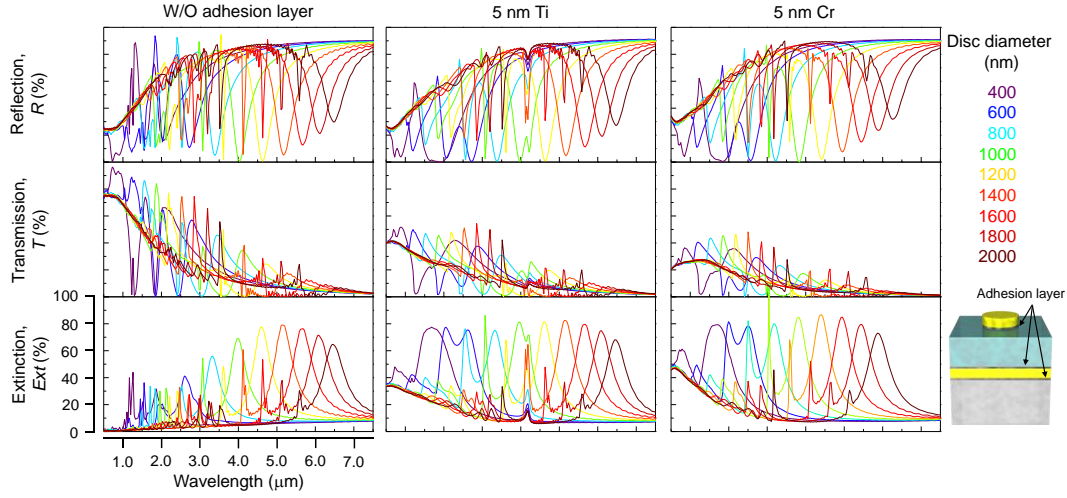

Figure S1 Influence of an adhesion nano-layer. FDTD simulations for thin-Au MIM metasurfaces without adhesion layer, with 5 nm Ti and 5 nm Cr as adhesion layers. Calculations are made for the MIM structure only without substrate.

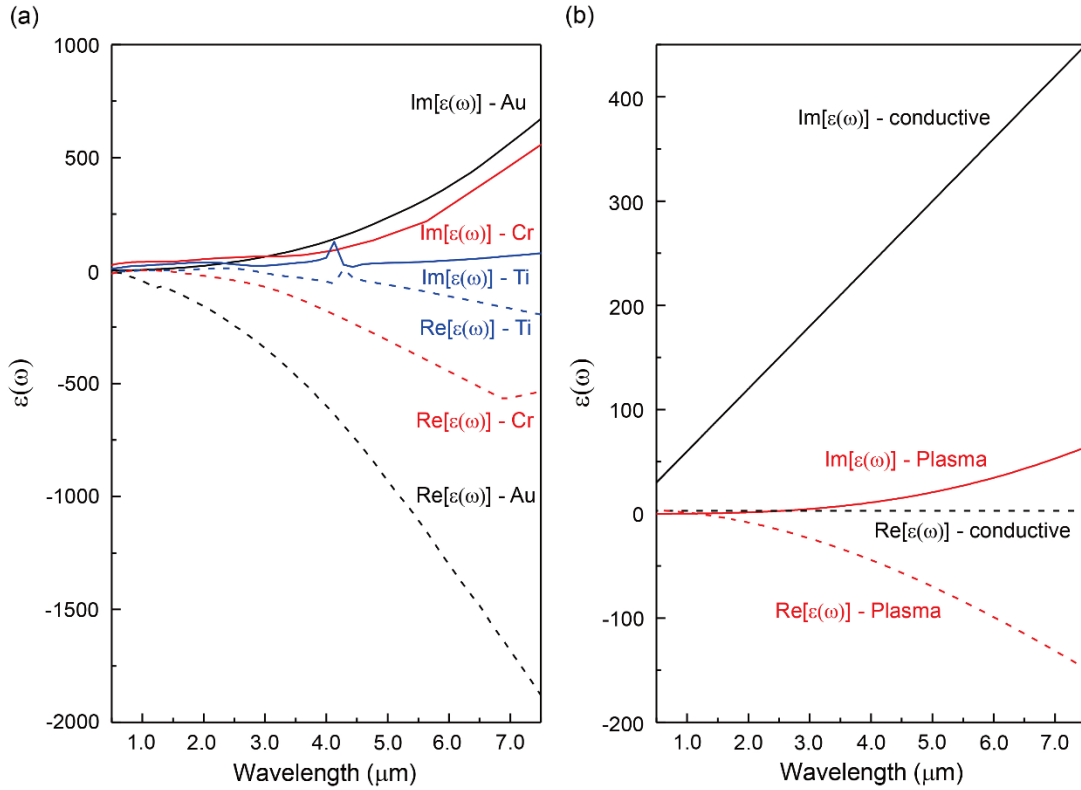

Figure S2 Optical permittivity of materials used in FDTD simulations: (a) Au, Cr, Ti obtained from Palik's database references. (b) Basic function implemented in the FDTD software for the 3D conductive and plasma (Drude) models with parameters of  $\epsilon_{DC} = 2.94$ ,  $\sigma = 1.0 \times 10^6 \text{ } (\Omega\text{cm})^{-1}$ ,  $\epsilon_{\infty} = 4.4$ ,  $\omega_P = 3.36 \times 10^{15} \text{ rad/s}$ ,  $\Gamma = 1.05 \times 10^{14} \text{ 1/s}$ .

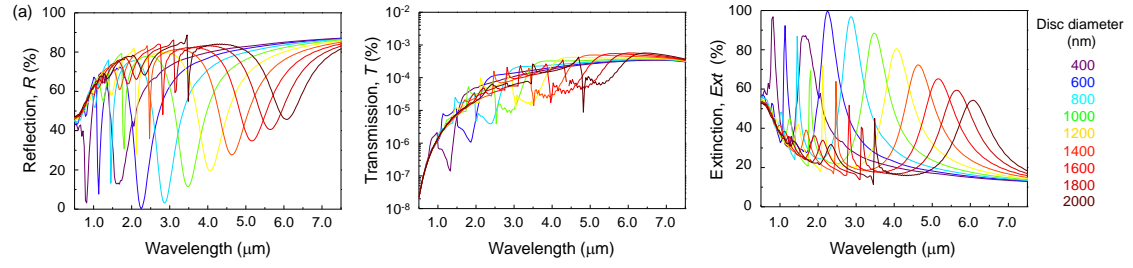

Figure S3 Reflectance  $R$ , Transmittance  $T$  and Extinction  $Ext = 1 - (R + T)$  spectra. FDTD simulations for ITO metasurfaces with 3D conductive model with  $\epsilon_{DC} = 2.94$ ,  $\sigma = 1.0 \times 10^6 (\Omega\text{cm})^{-1}$ .

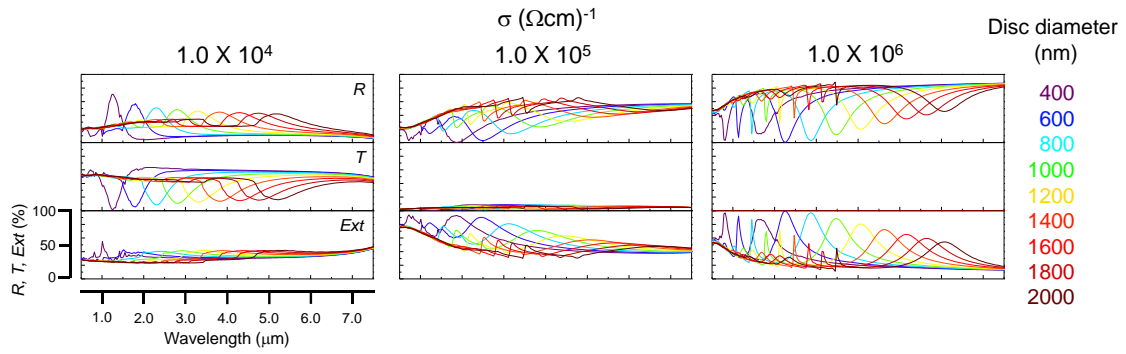

Figure S4 FDTD simulations for the 3D conductive model with  $\epsilon_{DC} = 2.94$  and  $\sigma$  is from  $1.0 \times 10^4$  to  $1.0 \times 10^6 (\Omega\text{cm})^{-1}$ .

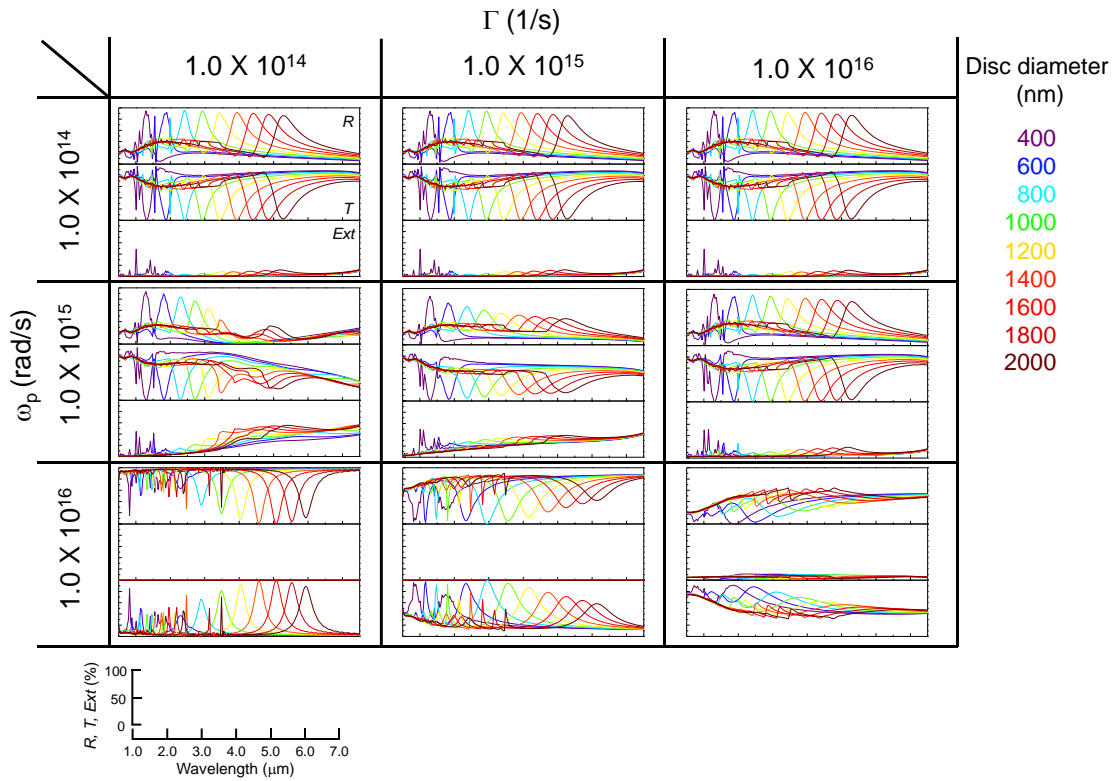

Figure S5 A series of FDTD simulations for the plasma model with  $\epsilon_{\infty} = 4.4$ ,  $\omega_p$  was changing from  $1.0 \times 10^{14}$  to  $1.0 \times 10^{16}$  rad/s,  $\Gamma$  is from  $1.0 \times 10^{14}$  to  $1.0 \times 10^{16}$  1/s.
